# Supplementary material
Source: HighWire-hosted journal article supplement (https://bmjopenquality.bmj.com/content/12/2/e002247)
Supplement: inline-supplementary-material-2 [file inline-supplementary-material-2.pdf]

### **Semi-structured interview guide**

- What experience do you have with the Green Cross?
- To what extent does the Green Cross contribute to learning and improvement work?
- To what extent does the interdisciplinary team contribute to reporting and learning with the Green Cross?
- To what extent has the pandemic affected the use of the Green Cross?
- To what extent is the Green Cross followed up at weekends?
- Can you tell us how it feels to talk about incidents that you or colleagues have handled well?
- To what extent can one learn from what goes well?
- Do you think sharing what has been handled well can affect interdisciplinary collaboration and the working environment?

### **Follow-up questions related to all questions in the interview guide are:**

- Can you tell me more?
- When you say ... what do you mean?
- Is it always like this?
- Can you elaborate?
- Can you explain in more detail?
- Can you share how it feels?
